# Supplementary material for: An injectable and degradable heterogeneous microgel assembly capable of forming a “micro-nest group” for cell condensation and cartilage regeneration
Source: Royal Society of Chemistry journal article supplement (doi:10.1039/d4mh00724g), 2024-01-01
Supplement: d4mh00724g1.pdf [file d4mh00724g1.pdf]

## Supporting Information

### **Injectable and degradation heterogeneous microgel assembly capable of forming "micro-nest group" for cell condensation and cartilage regeneration**

Zequ Lin<sup>1,2,7</sup>, Qingtao Li<sup>2,3,7</sup>, Xiyuan Han<sup>1,2</sup>, Huitong Luo<sup>1,2</sup>, Zetao Wang<sup>1,2</sup>, Zhihao Qin<sup>1,2</sup>, Yue Huang<sup>6</sup>, Qi Feng<sup>1,2,4,6\*</sup>, Xiaodong Cao<sup>1,2,4,5\*</sup>

<sup>1</sup>Department of Biomedical Engineering, School of Materials Science and Engineering, South China University of Technology, Guangzhou, 510006, China

<sup>2</sup>National Engineering Research Center for Tissue Restoration and Reconstruction (NERC-TRR), South China University of Technology, Guangzhou, 510006, China

<sup>3</sup>School of Medicine, South China University of Technology, Guangzhou 510006, P. R. China.

<sup>4</sup>Key Laboratory of Biomedical Materials and Engineering of the Ministry of Education, South China University of Technology, Guangzhou 510006, China

<sup>5</sup>Key Laboratory of Biomedical Engineering of Guangdong Province, South China University of Technology, Guangzhou, 510641, China

<sup>6</sup>School of Stomatology, Jinan University, Guangzhou, 510641, China

<sup>7</sup>These authors contributed equally

\*Correspondence:

[caoxd@scut.edu.cn](mailto:caoxd@scut.edu.cn) (X.D.C)

[feng2119@scut.edu.cn](mailto:feng2119@scut.edu.cn) (Q.F.)

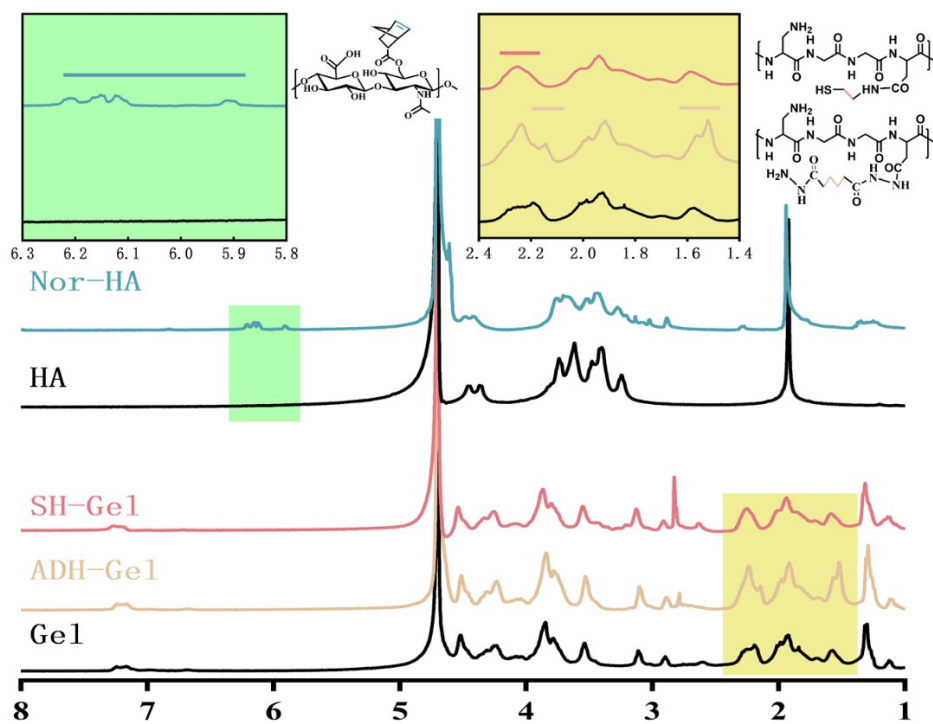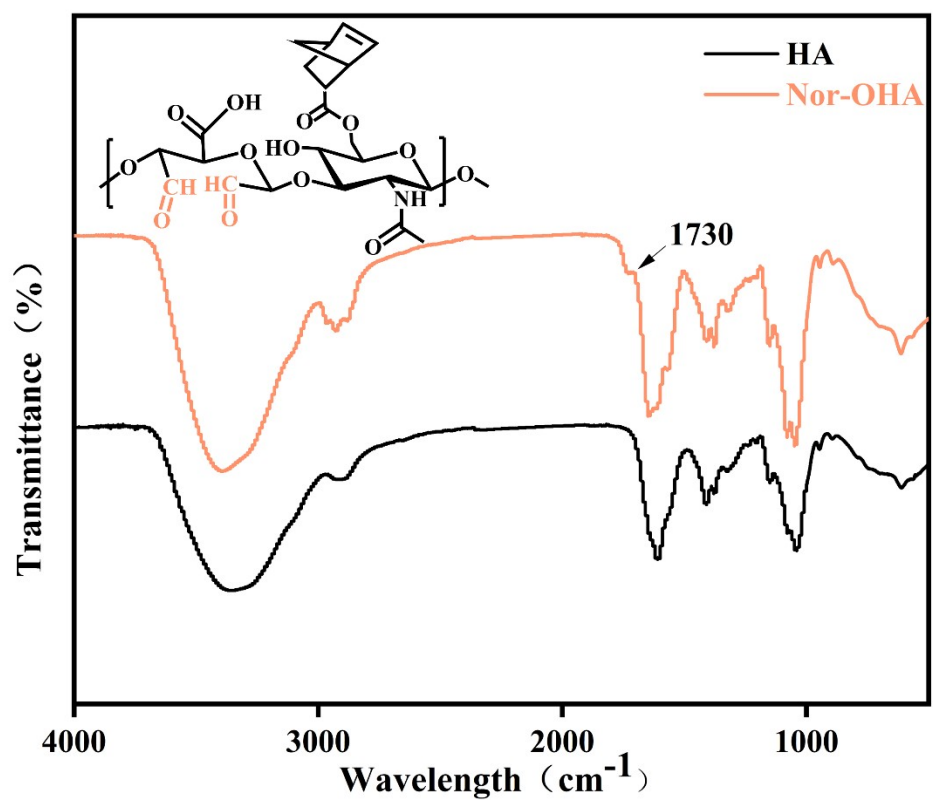

Figure S1.  $^1\text{H}$  NMR spectra of Nor-HA, ADH-Gel and SH-Gel, and IR spectra of Nor-OHA.

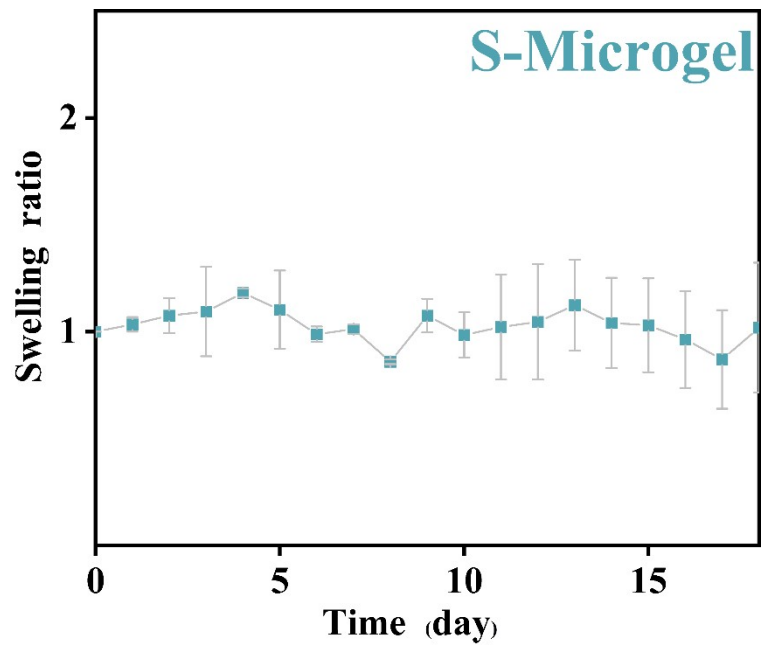

Figure S2. Swelling of S-microgel.

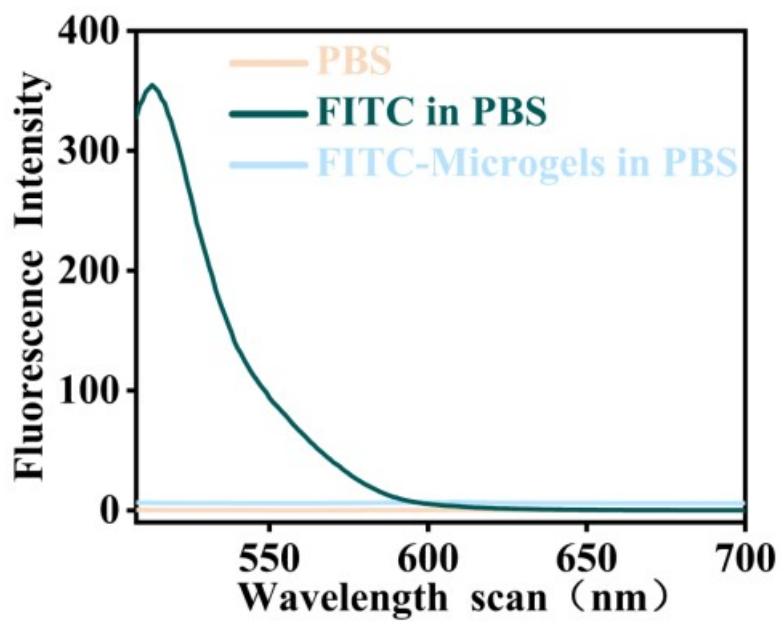

Figure S3. Fluorescence spectrum of FITC-PEG-SH loaded S-microgels.

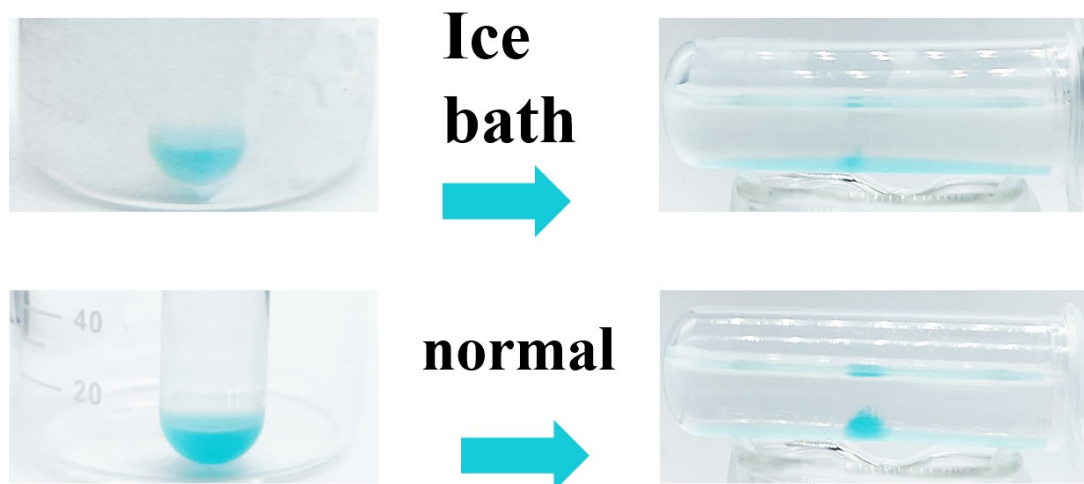

**Figure S4.** State of F-microgels at room temperature and in ice bath.

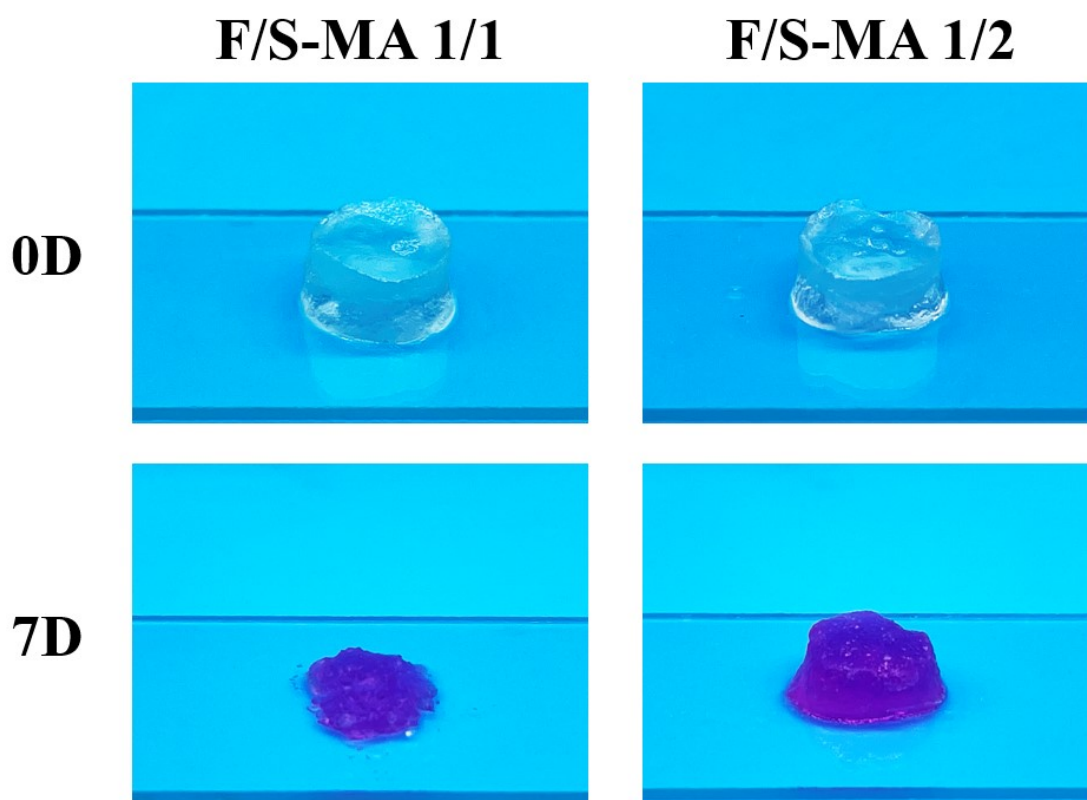

**Figure S5.** Macroscopic images of F/S-MA 1/1 and F/S-MA 1/2 after 1 and 7 days of degradation.

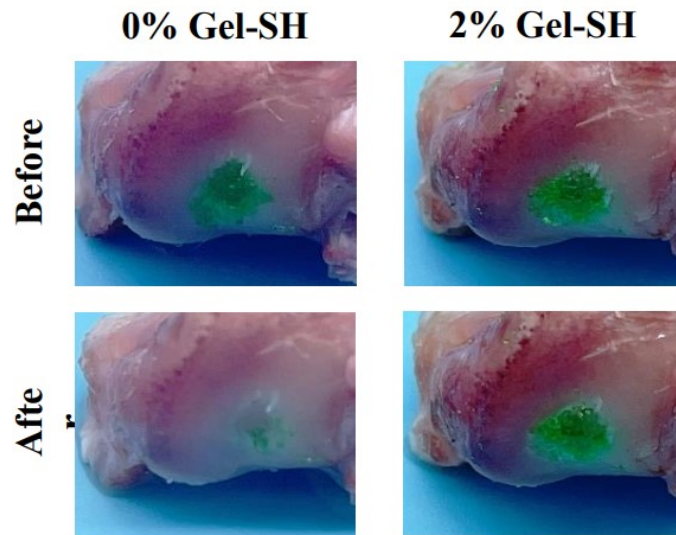

**Figure S6.** Adhesion of microgel assemblies, adhesion before and after PBS flushing.

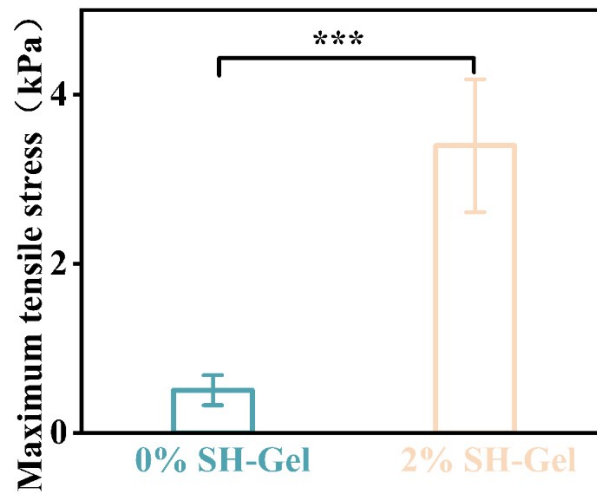

**Figure S7.** Maximum tensile stress of microgel assemblies. (Without and with assembly agent.)

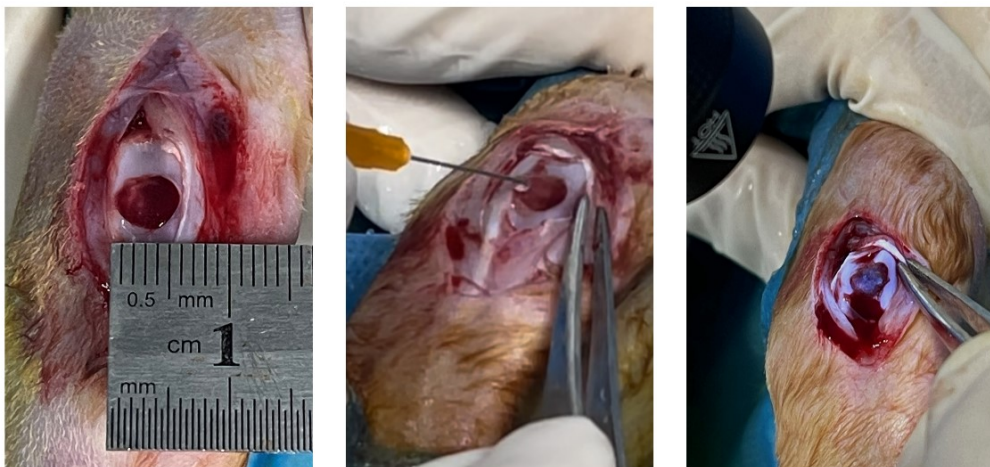

**Figure S8** Surgical procedures for the treatment of articular cartilage injuries

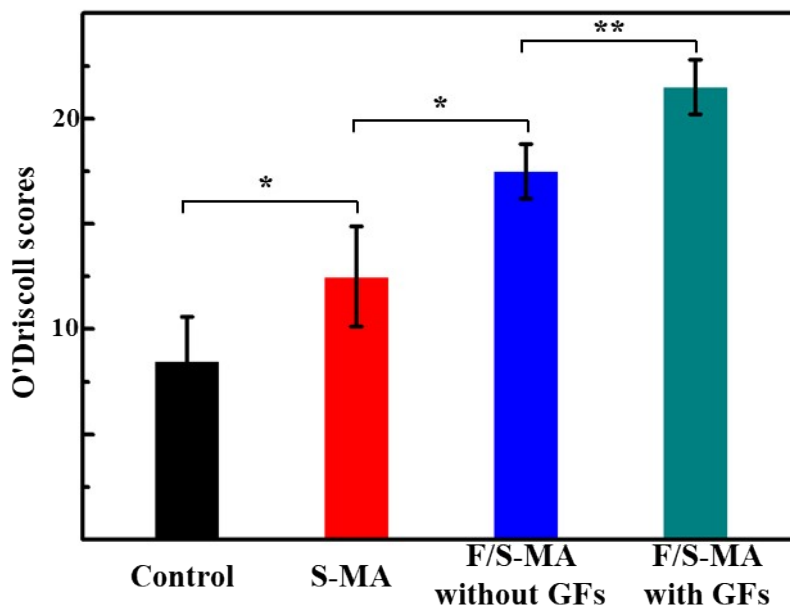

**Figure S9** O'Driscoll scores of Control (microfracture), S-MA, F/S-MA without GFs and F/S-MA with GFs.

**Table S1** Lists of primers using in RT-PCR

| Target gene | Sequence (5'-3')           |
|-------------|----------------------------|
| ACAN        | F: AGTGGATCGGTCTGAATGACAGG |
|             | R: AGAAGTTGTCAGGCTGGTTTGA  |
| Sox9        | F: AGCACAAGAAAGACCACCCC    |
|             | R: ATGTGAGTCTGTTCCGTGGC    |
| Col 2       | F: AGGGCAACAGCAGGTTACATAC  |
|             | R: TGTCCACACCAAATTCCTGTTCA |
| Col 1       | F: ATGCCGCGACCTCAAGATG     |
|             | R: TGAGGCACAGACGGCTGAGTA   |
| Gapdh       | F: GTCGGTGTGAACGGATTTGG    |
|             | R: CTGGAAGATGGTGATGGGCT    |

**Table S2** Modified cartilage repair score system

|                              |                                   | category                               | score |
|------------------------------|-----------------------------------|----------------------------------------|-------|
| Nature of predominant tissue | Cellular morphology               | Hyaline articular cartilage            | 4     |
|                              |                                   | Incompletely differentiated mesenchyme | 2     |
|                              |                                   | Fibrous tissue or bone                 | 0     |
|                              | Safranin O staining of the matrix | Normal or nearly normal                | 3     |
|                              |                                   | Moderate                               | 2     |
|                              |                                   | Slight                                 | 1     |

|                                               |                                                         |                                                      |    |
|-----------------------------------------------|---------------------------------------------------------|------------------------------------------------------|----|
|                                               |                                                         | None                                                 | 0  |
|                                               | Collagen                                                | normal or nearly normal                              | 3  |
|                                               | Hstaining of the matrix                                 | Moderate                                             | 2  |
|                                               |                                                         | Slight                                               | 1  |
|                                               |                                                         | None                                                 | 0  |
| Structural characteristics                    | Surface regularity                                      | Smooth and intact                                    | 3  |
|                                               |                                                         | Superficial horizontal lamination                    | 2  |
|                                               |                                                         | Fissures: 25–100% of the thickness                   | 1  |
|                                               |                                                         | Severe disruption, including fibrillation            | 0  |
|                                               | Structural integrity                                    | Normal                                               | 2  |
|                                               |                                                         | Slight disruption, including cysts                   | 1  |
|                                               |                                                         | Severe disintegration                                | 0  |
|                                               | Thickness                                               | 100% of normal adjacent cartilage                    | 2  |
|                                               |                                                         | 50–100% of normal cartilage                          | 1  |
|                                               |                                                         | 0–50% of normal cartilage                            | 0  |
| Bonding to the adjacent cartilage             | Bonded at both ends of graft                            | 2                                                    |    |
|                                               | Bonded at one end, or partially at both ends            | 1                                                    |    |
|                                               | Not bonded                                              | 0                                                    |    |
| Freedom from cellular changes of degeneration | Hypocellularity                                         | Normal cellularity                                   | 3  |
|                                               |                                                         | Slight hypocellularity                               | 2  |
|                                               |                                                         | Moderate hypocellularity                             | 1  |
|                                               |                                                         | Severe hypocellularity                               | 0  |
|                                               | Chondrocyte clustering                                  | No clusters                                          | 2  |
|                                               |                                                         | < 25% of the cells                                   | 1  |
|                                               |                                                         | 25–100% of the cells                                 | 0  |
|                                               | Freedom from degenerative changes in adjacent cartilage | Normal cellularity, no clusters, normal staining     | 3  |
|                                               |                                                         | Normal cellularity, mild clusters, moderate staining | 2  |
|                                               |                                                         | Mild or moderate hypocellularity, slight staining    | 1  |
| Severe hypocellularity, poor or nostaining    |                                                         | 0                                                    |    |
| total score                                   |                                                         |                                                      | 27 |
